# Supplementary material for: Do gestures retain mental associations with their iconic origins, even after they become emblematic? An analysis of the middle-finger gesture among American English speakers
Source: PLoS One. 2019 Apr 30;14(4):e0215633. doi: 10.1371/journal.pone.0215633 (PMC6490901; doi:10.1371/journal.pone.0215633)
Supplement: S1 File — De-identified responses for critical trials in each experiment. (XLSX) [file pone.0215633.s001.xlsx]

## Sheet: Experiment1
SubjectID	sex	age	pea__prime	pen_prime	pea__resp	pen__resp
1	MALE	26	down	bird	other	penis
2	FEMALE	30	peace	ok	peace	penis
3	FEMALE	49	down	ok	peace	other
4	MALE	27	down	ok	peace	penis
5	MALE	22	peace	bird	peace	penis
6	MALE	52	peace	bird	other	penis
7	MALE	31	down	ok	other	penis
8	MALE	46	peace	bird	other	other
9	FEMALE	23	down	ok	other	penis
10	MALE	37	down	ok	peace	other
11	MALE	22	peace	ok	other	other
12	MALE	60	peace	bird	other	other
13	MALE	47	down	bird	peace	penis
14	MALE	30	peace	ok	other	other
15	FEMALE	47	down	bird	other	penis
16	FEMALE	65	peace	ok	other	other
17	MALE	23	down	bird	other	penis
18	FEMALE	45	down	ok	peace	penis
19	MALE	43	peace	ok	other	penis
20	MALE	45	down	bird	peace	other
21	FEMALE	25	down	bird	other	penis
22	FEMALE	53	peace	ok	peace	other
23	MALE	29	peace	bird	other	other
24	MALE	30	down	ok	other	penis
25	MALE	23	peace	ok	peace	other
26	FEMALE	56	down	bird	peace	penis
27	MALE	27	down	bird	peace	penis
28	FEMALE	31	peace	ok	other	other
29	MALE	35	peace	bird	peace	penis
30	MALE	24	peace	ok	other	penis
31	MALE	42	down	bird	other	penis
32	MALE	45	down	bird	other	penis
33	MALE	31	peace	bird	other	penis
34	FEMALE	29	down	ok	peace	penis
35	MALE	22	peace	ok	other	penis
36	MALE	44	peace	ok	peace	other
37	MALE	36	peace	ok	peace	penis
38	MALE	26	peace	bird	other	other
39	MALE	57	down	ok	other	other
40	MALE	32	down	bird	other	penis
41	FEMALE	54	peace	ok	other	penis
42	FEMALE	29	down	bird	other	other
43	FEMALE	26	down	bird	other	penis
44	MALE	34	peace	ok	peace	penis
45	FEMALE	27	peace	bird	other	penis
46	FEMALE	19	down	ok	other	penis
47	FEMALE	50	peace	ok	peace	other
48	MALE	24	down	bird	peace	other
49	FEMALE	30	down	bird	other	penis
50	FEMALE	22	down	ok	other	penis
51	FEMALE	49	peace	ok	other	penis
52	FEMALE	26	down	bird	other	penis
53	MALE	39	peace	bird	peace	penis
54	FEMALE	28	down	bird	other	penis
55	MALE	46	peace	ok	peace	other
56	FEMALE	38	peace	bird	peace	other
57	FEMALE	52	peace	bird	other	penis
58	MALE	51	down	ok	other	other
59	MALE	23	peace	bird	peace	penis
60	MALE	25	down	ok	peace	penis
61	FEMALE	43	peace	bird	peace	penis
62	MALE	40	peace	ok	peace	penis
63	FEMALE	28	peace	ok	other	penis
64	FEMALE	64	down	bird	other	other
65	MALE	54	down	bird	other	other
66	FEMALE	35	peace	ok	peace	penis
67	FEMALE	25	down	ok	other	penis
68	FEMALE	43	down	ok	peace	penis
69	FEMALE	52	peace	bird	peace	penis
70	MALE	60	peace	bird	peace	penis
71	MALE	29	peace	ok	peace	penis
72	MALE	27	down	bird	other	penis
73	MALE	43	down	bird	other	penis
74	MALE	35	peace	ok	peace	penis
75	MALE	27	down	ok	other	penis
76	MALE	53	peace	bird	peace	penis
77	FEMALE	33	down	ok	other	other
78	FEMALE	30	down	ok	other	other
79	MALE	73	peace	bird	other	other
80	FEMALE	25	down	ok	other	other
81	FEMALE	41	down	ok	peace	penis
82	FEMALE	56	peace	bird	other	penis
83	MALE	23	down	ok	other	penis
84	FEMALE	30	peace	bird	peace	other
85	FEMALE	24	down	bird	peace	penis
86	FEMALE	21	peace	ok	other	penis
87	MALE	20	down	bird	other	penis
88	MALE	44	down	bird	other	other
89	MALE	68	peace	ok	other	other
90	FEMALE	62	down	ok	other	other
91	MALE	26	peace	ok	peace	other
92	FEMALE	45	down	bird	other	penis
93	FEMALE	19	peace	bird	peace	penis
94	MALE	20	peace	bird	peace	penis
95	FEMALE	36	down	ok	other	other
96	FEMALE	63	down	bird	other	other
97	MALE	29	peace	ok	peace	penis
98	FEMALE	36	peace	bird	other	other
99	MALE	48	down	ok	other	penis
100	MALE	32	peace	bird	other	penis
101	FEMALE	20	down	ok	other	penis
102	MALE	56	peace	ok	peace	other
103	FEMALE	37	peace	bird	peace	other
104	MALE	20	down	ok	other	penis
105	MALE	31	down	ok	other	penis
106	FEMALE	48	peace	bird	peace	penis
107	MALE	30	peace	bird	peace	penis
108	MALE	42	down	ok	peace	penis
109	FEMALE	24	down	bird	other	penis
110	FEMALE	21	peace	ok	peace	other
111	FEMALE	33	down	bird	other	other
112	FEMALE	28	down	bird	other	other
113	FEMALE	27	peace	ok	other	penis
114	FEMALE	30	peace	ok	other	penis
115	FEMALE	40	peace	ok	other	penis
116	MALE	60	down	bird	other	other
117	MALE	27	down	ok	other	penis
118	FEMALE	45	down	bird	peace	penis
119	FEMALE	24	down	ok	other	other
120	FEMALE	27	down	bird	other	penis
121	FEMALE	27	peace	ok	other	penis
122	FEMALE	24	down	ok	other	penis
123	FEMALE	22	peace	bird	peace	penis
124	MALE	20	peace	ok	peace	penis
125	FEMALE	51	peace	bird	peace	other
126	FEMALE	35	down	ok	peace	penis
127	FEMALE	34	peace	ok	peace	penis
128	FEMALE	32	down	bird	other	penis
129	FEMALE	25	peace	bird	peace	penis
130	FEMALE	30	down	ok	other	other
131	FEMALE	24	down	bird	other	penis
132	FEMALE	20	peace	ok	peace	penis
133	FEMALE	54	peace	bird	peace	penis
134	MALE	26	peace	ok	other	penis
135	FEMALE	37	peace	ok	peace	other
136	FEMALE	45	down	bird	peace	penis
137	FEMALE	28	peace	bird	other	other
138	MALE	31	down	ok	other	penis
139	MALE	42	down	bird	peace	penis
140	FEMALE	51	peace	ok	peace	penis
141	MALE	31	down	bird	other	penis
142	FEMALE	42	down	ok	other	other
143	FEMALE	46	peace	bird	peace	other
144	MALE	44	peace	bird	other	penis
145	FEMALE	48	peace	ok	other	penis
146	FEMALE	54	down	bird	peace	penis
147	FEMALE	27	down	ok	other	other
148	MALE	34	peace	ok	peace	penis
149	MALE	31	down	ok	peace	penis
150	FEMALE	26	down	ok	0	other
151	MALE	21	down	ok	peace	penis
152	FEMALE	21	peace	bird	peace	other
153	MALE	24	down	ok	other	other
154	FEMALE	34	peace	bird	peace	penis
155	MALE	31	peace	bird	peace	penis
156	MALE	65	peace	bird	other	other
157	MALE	31	down	ok	other	penis
158	FEMALE	20	peace	ok	peace	penis
159	FEMALE	30	down	ok	peace	other
160	MALE	54	down	bird	other	penis
161	MALE	42	peace	bird	peace	penis
162	FEMALE		peace	bird	other	other
163	MALE	45	peace	bird	other	penis
164	MALE	22	down	bird	other	penis
165	FEMALE	32	peace	bird	other	penis
166	MALE	63	peace	bird	other	penis
167	FEMALE	35	peace	ok	peace	penis
168	MALE	67	down	ok	other	other
169	FEMALE		peace	ok	other	other
170	FEMALE	34	down	bird	other	penis
171	MALE	43	peace	ok	peace	penis
172	MALE	32	down	ok	other	penis
173	MALE	31	down	bird	peace	other
174	FEMALE	42	down	ok	other	penis
175	MALE	29	down	ok	other	penis
176	FEMALE	52	peace	ok	peace	other
177	MALE	33	down	ok	other	other
178	FEMALE	25	down	bird	other	other
179	MALE	45	down	bird	other	other
180	FEMALE	24	down	bird	other	penis
181	MALE	38	peace	ok	peace	penis
182	MALE	59	down	bird	other	other
183	FEMALE		down	bird	other	other
184	FEMALE	57	peace	ok	peace	other
185	FEMALE	33	down	bird	other	other
186	FEMALE	26	peace	ok	peace	other
187	MALE	53	peace	bird	other	penis
188	MALE	40	down	ok	peace	other
189	MALE	28	peace	ok	peace	penis
190	FEMALE	62	down	ok	peace	other
191	FEMALE	36	peace	bird	peace	penis
192	MALE	30	down	bird	other	penis
193	MALE	25	peace	bird	peace	penis
194	MALE	35	peace	bird	peace	other
195	FEMALE	35	peace	bird	peace	other
196	MALE	60	down	ok	other	penis
197	MALE	49	down	ok	other	penis

## Sheet: Experiment2
SubjectID	sex	age	pea__prime	pen_prime	pea__resp	pen__resp
1	MALE	22	down	ok	other	penis
2	MALE	20	peace	bird	peace	penis
3	MALE	31	down	bird	other	penis
4	FEMALE	25	down	intercourse	peace	other
5	FEMALE	53	peace	ok	other	penis
7	FEMALE	22	peace	bird	other	other
9	FEMALE	25	peace	intercourse	peace	penis
10	FEMALE	25	down	bird	other	penis
12	FEMALE	40	down	intercourse	other	other
13	FEMALE	50	peace	ok	peace	other
14	MALE	24	peace	ok	other	penis
15	FEMALE	31	peace	bird	other	penis
16	FEMALE	34	down	intercourse	peace	penis
17	FEMALE	27	down	ok	other	other
18	MALE	22	peace	intercourse	other	penis
19	FEMALE	24	peace	intercourse	peace	penis
20	FEMALE	51	peace	bird	peace	other
21	MALE	30	down	intercourse	other	other
22	MALE	39	peace	ok	peace	penis
23	FEMALE	34	peace	bird	other	penis
25	MALE	32	down	ok	other	penis
27	FEMALE	19	down	bird	other	penis
30	MALE	20	peace	ok	other	other
31	MALE	24	peace	intercourse	peace	penis
32	FEMALE	27	down	intercourse	other	penis
33	MALE	37	peace	bird	other	other
34	MALE	22	down	ok	other	penis
35	MALE	24	down	intercourse	other	penis
36	MALE	18	peace	ok	other	penis
37	MALE	32	peace	intercourse	peace	penis
38	MALE	37	peace	bird	other	penis
39	FEMALE	28	down	bird	other	penis
40	FEMALE	38	peace	intercourse	other	penis
41	MALE	21	down	intercourse	other	other
42	FEMALE	26	down	bird	other	penis
43	FEMALE	29	peace	ok	other	penis
44	FEMALE	41	down	bird	other	other
45	MALE	26	peace	bird	peace	penis
46	MALE	19	down	intercourse	other	penis
47	FEMALE	23	peace	ok	peace	penis
48	FEMALE	48	down	intercourse	peace	penis
49	MALE	34	peace	ok	peace	penis
50	MALE	23	down	intercourse	other	penis
52	FEMALE	41	down	bird	other	penis
53	MALE	33	peace	ok	other	penis
54	MALE	25	peace	ok	other	other
55	FEMALE	23	peace	ok	other	other
56	MALE	29	peace	bird	peace	penis
57	FEMALE	25	peace	bird	peace	penis
58	FEMALE	37	peace	intercourse	peace	penis
59	FEMALE	25	down	ok	peace	penis
60	MALE	20	down	intercourse	peace	penis
61	FEMALE	31	peace	ok	peace	other
62	MALE	40	down	intercourse	other	penis
63	MALE	35	down	ok	other	penis
64	MALE	30	down	ok	peace	penis
65	MALE	26	down	ok	other	other
66	MALE	49	peace	bird	peace	other
67	MALE	38	down	intercourse	other	penis
68	FEMALE	21	down	intercourse	other	penis
69	MALE	25	peace	ok	other	penis
70	MALE	27	down	ok	peace	penis
71	FEMALE	30	down	intercourse	peace	penis
72	MALE	27	down	bird	other	penis
73	MALE	22	peace	bird	peace	penis
74	MALE	24	peace	bird	peace	penis
75	MALE	34	down	ok	peace	penis
76	MALE	32	peace	intercourse	peace	penis
77	FEMALE	25	down	intercourse	other	penis
78	FEMALE	19	down	ok	other	penis
79	MALE	31	down	intercourse	other	penis
80	MALE	30	peace	intercourse	other	penis
81	MALE	29	peace	bird	other	other
82	MALE	39	peace	bird	peace	penis
83	MALE	33	down	intercourse	peace	penis
84	MALE	26	peace	bird	peace	penis
85	MALE	27	down	ok	other	penis
86	FEMALE	30	down	ok	other	other
87	MALE	32	peace	ok	peace	other
89	MALE	21	peace	ok	peace	other
90	MALE	25	peace	intercourse	other	penis
91	FEMALE	29	peace	intercourse	peace	penis
92	FEMALE	29	down	bird	other	penis
93	MALE	35	peace	bird	other	other
94	MALE	28	peace	intercourse	peace	penis
95	MALE	21	peace	intercourse	other	penis
96	MALE	28	peace	ok	peace	penis
98	FEMALE	38	peace	ok	other	penis
99	MALE	30	down	bird	other	penis
100	FEMALE	27	down	intercourse	other	penis
101	MALE	32	peace	bird	other	penis
102	FEMALE	35	down	bird	peace	other
103	FEMALE	31	down	intercourse	other	penis
104	MALE	31	down	intercourse	other	other
105	MALE	24	peace	bird	other	penis
106	MALE	21	down	bird	other	other
107	MALE	34	down	intercourse	other	other
108	FEMALE	36	peace	ok	peace	penis
109	MALE	36	peace	ok	other	penis
110	MALE	32	peace	intercourse	peace	penis
111	FEMALE	31	down	ok	peace	penis
112	FEMALE	29	peace	intercourse	peace	penis
114	FEMALE	38	down	bird	other	other
115	MALE	19	peace	ok	peace	penis
116	MALE	25	down	bird	peace	penis
117	MALE	34	peace	bird	peace	penis
118	FEMALE	31	peace	intercourse	peace	penis
120	FEMALE	32	down	bird	other	other
121	FEMALE	51	down	ok	other	other
122	FEMALE	26	peace	intercourse	peace	penis
123	MALE	25	peace	bird	other	other
124	FEMALE	29	down	intercourse	other	other
125	FEMALE	30	down	bird	peace	penis
126	MALE	41	peace	ok	peace	other
127	MALE	30	peace	bird	peace	penis
128	FEMALE	49	down	intercourse	other	penis
129	MALE	28	down	intercourse	peace	penis
130	FEMALE	29	down	bird	other	penis
131	FEMALE	29	peace	ok	other	penis
132	FEMALE	50	down	bird	other	other
133	MALE	22	peace	intercourse	peace	penis
134	FEMALE	39	peace	ok	peace	penis
135	MALE	29	down	intercourse	other	penis
136	MALE	21	down	ok	peace	penis
137	FEMALE	51	down	bird	peace	penis
138	MALE	25	peace	intercourse	other	penis
139	FEMALE	28	down	intercourse	other	penis
140	FEMALE	39	peace	ok	other	other
142	FEMALE	42	peace	bird	peace	other
143	MALE	29	down	ok	peace	penis
144	FEMALE	38	down	ok	other	other
145	FEMALE	23	peace	bird	peace	penis
146	MALE	32	peace	intercourse	peace	penis
147	MALE	21	peace	bird	other	penis
148	MALE	46	peace	ok	peace	penis
149	FEMALE	30	down	intercourse	other	penis
150	MALE	25	peace	ok	other	penis
151	MALE	32	peace	bird	other	penis
152	MALE	28	down	intercourse	other	penis
153	MALE	45	down	intercourse	other	other
154	FEMALE	31	down	ok	peace	penis
155	MALE	36	peace	ok	peace	penis
156	FEMALE	31	down	ok	peace	penis
157	FEMALE	25	peace	bird	other	penis
158	FEMALE	33	peace	bird	other	other
159	FEMALE	25	peace	intercourse	peace	penis
160	FEMALE	52	down	intercourse	other	other
161	MALE	35	down	ok	other	penis
162	MALE	26	down	bird	other	penis
163	FEMALE	35	peace	intercourse	other	penis
164	MALE	63	peace	bird	other	other
165	MALE	25	down	ok	other	penis
166	MALE	30	peace	bird	peace	penis
167	MALE	21	peace	intercourse	peace	penis
168	MALE	43	down	ok	peace	penis
169	MALE	27	down	intercourse	other	penis
170	FEMALE	26	down	intercourse	other	penis
171	MALE	28	peace	ok	other	penis
172	MALE	29	down	bird	other	penis
173	MALE	55	down	bird	other	other
174	MALE	23	peace	ok	peace	penis
175	FEMALE	33	down	bird	other	penis
176	FEMALE	30	down	ok	peace	penis
177	FEMALE	36	peace	intercourse	peace	other
178	MALE	33	peace	bird	peace	penis
179	FEMALE	34	down	intercourse	peace	penis
180	FEMALE	33	down	ok	other	penis
182	MALE	43	down	bird	other	penis
183	MALE	23	peace	bird	peace	penis
184	MALE	26	peace	ok	other	other
185	FEMALE	23	down	ok	other	other
186	FEMALE	28	down	intercourse	other	penis
187	MALE	24	peace	intercourse	peace	penis
188	MALE	21	peace	bird	peace	penis
189	MALE	25	down	intercourse	other	penis
190	FEMALE	26	down	bird	peace	penis
191	FEMALE	29	peace	ok	peace	penis
192	MALE	27	down	intercourse	other	penis
193	MALE	26	down	bird	other	other
194	MALE	44	down	intercourse	other	penis
195	MALE	23	peace	bird	peace	other
196	FEMALE	53	peace	ok	peace	other
197	MALE	30	down	intercourse	peace	penis
198	MALE	21	peace	bird	peace	penis
199	MALE	29	down	intercourse	other	penis
200	MALE	33	peace	ok	other	penis
201	MALE	21	down	bird	other	penis
202	FEMALE	24	peace	ok	other	other
203	MALE	27	peace	ok	other	other
204	FEMALE	21	down	bird	other	penis
205	MALE	32	peace	intercourse	peace	penis
206	MALE	28	down	intercourse	other	penis
207	FEMALE	26	peace	bird	peace	penis
208	MALE	24	down	ok	other	penis
209	MALE	25	down	ok	other	other
210	FEMALE	25	peace	intercourse	other	other
211	FEMALE	32	down	ok	other	other
212	MALE	54	down	bird	other	penis
213	MALE	23	peace	ok	peace	penis
214	MALE	50	down	intercourse	other	penis
215	MALE	21	peace	bird	peace	penis
216	MALE	22	down	intercourse	other	penis
217	FEMALE	24	down	bird	other	penis
218	MALE	22	down	intercourse	other	penis
219	MALE	44	down	bird	other	other
220	MALE	25	peace	ok	other	penis
221	FEMALE	26	down	intercourse	other	penis
222	MALE	22	peace	bird	peace	other
223	MALE	19	down	bird	other	other
224	MALE	28	peace	ok	peace	other
225	MALE	52	down	intercourse	other	penis
226	MALE	39	peace	ok	peace	penis
227	FEMALE	31	down	ok	other	penis
228	FEMALE	21	peace	bird	other	penis
229	FEMALE	33	down	ok	other	penis
230	FEMALE	32	peace	ok	other	other
231	FEMALE	29	peace	intercourse	peace	penis
232	MALE	22	peace	bird	peace	penis
233	MALE	39	peace	bird	peace	penis
234	MALE	38	peace	intercourse	peace	penis
235	FEMALE	25	peace	ok	peace	other
236	MALE	50	peace	intercourse	peace	penis
237	MALE	38	down	bird	peace	other
238	MALE	56	down	ok	other	other
239	MALE	39	down	ok	other	other
240	MALE	32	down	bird	other	penis
241	MALE	21	down	bird	peace	penis
242	MALE	50	peace	ok	peace	penis
243	MALE	24	peace	bird	other	penis
244	FEMALE	37	down	ok	other	penis
245	FEMALE	23	peace	intercourse	peace	penis
246	FEMALE	36	peace	intercourse	peace	penis
247	MALE	21	peace	ok	peace	other
248	MALE	29	down	ok	peace	other
249	MALE	27	down	bird	other	other
